# Supplementary material for: Metabolomics and Lipidomics Analyses Aid Model Classification of Type 2 Diabetes in Non-Human Primates
Source: MDPI journal article supplement (doi:10.3390/metabo14030159), 2024-03-09
Supplement: s1 [file s1]

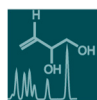

**Table S1.** The total number (N) of lipids in each class, the number and percentage of significantly different lipids between Dys and Healthy samples. \*FDR <0.05;  $fc > 1.5$  |  $fc < (1/1.5)$  and  $vip > 1$

| Class  | N   | Significant Lipids* | % within class | GAGE p-value |
|--------|-----|---------------------|----------------|--------------|
| PC     | 127 | 21                  | 16.5           | 0.0129       |
| TG     | 93  | 7                   | 7.5            | 0.8162       |
| FA     | 29  | 4                   | 13.8           | 0.4885       |
| PE     | 27  | 3                   | 11.1           | 0.2012       |
| DG     | 12  | 3                   | 25.0           | 0.4490       |
| SM     | 30  | 1                   | 3.3            | 0.9549       |
| LPC    | 23  | 1                   | 4.3            | 0.7732       |
| GlcCer | 3   | 1                   | 33.3           | 0.2059       |
| Cer    | 25  | 1                   | 4.0            | 0.6166       |

**Table S2.** Significant lipids by descending VIP order contributing the most to differentiating Healthy from Dys states. Structural stereoisomers are denoted by A, B and C

| Annotation                    | FC     | FDR    | VIP    |
|-------------------------------|--------|--------|--------|
| PC(35:3)                      | 1.6291 | 0.0010 | 2.3798 |
| PC(38:3)                      | 1.9543 | 0.0010 | 2.3796 |
| PC(37:6)                      | 1.5146 | 0.0010 | 2.2654 |
| PC(33:1)                      | 1.9531 | 0.0028 | 2.2511 |
| PC(35:1)                      | 1.7966 | 0.0054 | 2.1368 |
| PC (42:6)                     | 2.1149 | 0.0046 | 2.1325 |
| PC(36:4) B                    | 1.6885 | 0.0051 | 2.1221 |
| PC (37:3)                     | 1.6103 | 0.0046 | 2.0473 |
| LPC (18:2)                    | 0.3663 | 0.0074 | 2.0141 |
| TG(54:8)                      | 3.8418 | 0.0028 | 2.0138 |
| PC(34:3) A                    | 1.6837 | 0.0090 | 1.9501 |
| PC(36:5) C                    | 1.6584 | 0.0121 | 1.8901 |
| PC (p-34:0) or PC (o-34:1)    | 2.2122 | 0.0187 | 1.8164 |
| TG(58:5)                      | 1.6978 | 0.0200 | 1.7891 |
| PC (p-34:1) or PC (o-34:2) A  | 2.0098 | 0.0200 | 1.7673 |
| PC(32:1)                      | 1.6560 | 0.0297 | 1.7563 |
| PC(36:1)                      | 1.5741 | 0.0357 | 1.7519 |
| PE (p-36:5) or PE (o-36:6)    | 1.6803 | 0.0214 | 1.7406 |
| PC(34:4)                      | 1.5108 | 0.0250 | 1.7343 |
| TAG 55:4; TAG 18:1-18:2-19:1; | 1.9117 | 0.0239 | 1.7332 |
| PE (p-34:2) or PE (o-34:3)    | 1.8494 | 0.0279 | 1.7270 |
| PC (38:3)                     | 1.7275 | 0.0279 | 1.7046 |
| FA (15:0) (pentadecylic acid) | 1.8609 | 0.0214 | 1.7006 |
| DG(36:2)                      | 1.6525 | 0.0239 | 1.6966 |
| PC(38:7)                      | 1.6715 | 0.0239 | 1.6868 |
| GlcCer (d40:1)                | 2.8442 | 0.0279 | 1.6376 |
| DG(34:3)                      | 1.7987 | 0.0325 | 1.6206 |
| TG(58:9)                      | 1.5475 | 0.0297 | 1.6145 |

|                              |        |        |        |
|------------------------------|--------|--------|--------|
| PC (p-40:4) or PC (o-40:5)   | 1.8630 | 0.0362 | 1.5959 |
| TG(54:4)                     | 1.7486 | 0.0325 | 1.5877 |
| TG(56:9)                     | 1.7266 | 0.0297 | 1.5875 |
| TG(54:2)                     | 1.7510 | 0.0411 | 1.5852 |
| FA (17:0) (margaric acid)    | 1.7754 | 0.0282 | 1.5743 |
| PC (p-38:4) or PC (o-38:5) B | 1.6465 | 0.0409 | 1.5719 |
| PC(36:3) B                   | 1.9695 | 0.0454 | 1.5549 |
| PC (37:4)                    | 1.7006 | 0.0331 | 1.5450 |
| PE (p-38:4) or PE (o-38:5)   | 2.1205 | 0.0297 | 1.5284 |
| DG(36:5)                     | 2.0419 | 0.0357 | 1.5260 |
| FA (13:0) (tridecylic acid)  | 1.6763 | 0.0379 | 1.5150 |
| Cer(d42:2) B                 | 2.2252 | 0.0482 | 1.4527 |
| SM (d38:1)                   | 1.9396 | 0.0419 | 1.4259 |
| FA (28:0) (montanic acid)    | 1.6503 | 0.0411 | 1.4208 |

**Table S3.** Selected lipids (in descending VIP order) contributing to differentiating Dia from Dys. \*FDR <0.05; fc > 1.5 | fc < (1/1.5) and vip > 1

| Annotation                    | FC     | FDR*   | VIP    |
|-------------------------------|--------|--------|--------|
| DG(38:6)                      | 2.3479 | 0.0006 | 2.1354 |
| PC(p-40:5)/PC(o-40:6)         | 1.5045 | 0.0152 | 1.9714 |
| TG(58:10)                     | 2.8705 | 0.0006 | 1.9499 |
| TG(54:6) C                    | 2.7686 | 0.0009 | 1.9051 |
| LPC (18:2)                    | 2.7829 | 0.0006 | 1.8916 |
| TG(58:9)                      | 2.2372 | 0.0009 | 1.8612 |
| TG(56:8) A                    | 2.1503 | 0.0009 | 1.8549 |
| LPC(22:5)                     | 1.6075 | 0.0062 | 1.8284 |
| TG(54:7) B                    | 2.1795 | 0.0022 | 1.7912 |
| TG(44:0)                      | 1.8526 | 0.0062 | 1.7474 |
| TG(59:2)                      | 2.1577 | 0.0152 | 1.7261 |
| TG(57:1)                      | 1.7444 | 0.0143 | 1.7194 |
| PE (p-38:4) or PE (o-38:5)    | 0.3858 | 0.0167 | 1.7079 |
| TAG 47:0; TAG 14:0-16:0-17:0; | 1.6289 | 0.0104 | 1.6929 |
| LPC(16:1)                     | 0.6308 | 0.0157 | 1.6831 |
| TG(62:2)                      | 2.0503 | 0.0184 | 1.6714 |
| TG(56:7) A                    | 3.006  | 0.0023 | 1.6689 |
| TG(55:1)                      | 1.6543 | 0.0174 | 1.6589 |
| FA (26:0) (cerotic acid)      | 0.6473 | 0.0353 | 1.6369 |
| TG(64:2)                      | 2.2618 | 0.0143 | 1.6211 |
| TG(46:3) B                    | 2.0152 | 0.0176 | 1.619  |
| TAG 50:4; TAG 16:0-16:3-18:1; | 2.6137 | 0.0121 | 1.6114 |
| DG(38:5)                      | 1.7635 | 0.0082 | 1.607  |
| TG(54:5) B                    | 1.8599 | 0.0069 | 1.6006 |
| PC(32:1)                      | 0.5496 | 0.0094 | 1.5971 |

|                                   |        |        |        |
|-----------------------------------|--------|--------|--------|
| TAG 58:7; TAG 18:0-18:1-22:6;     | 2.6645 | 0.0069 | 1.5917 |
| SM (d33:1)                        | 0.3542 | 0.0143 | 1.589  |
| LPC(18:0)                         | 1.6601 | 0.0152 | 1.5711 |
| TG(52:4)                          | 2.4427 | 0.0094 | 1.5614 |
| DG(36:4) A                        | 2.7465 | 0.0069 | 1.5404 |
| PC(34:3) A                        | 0.624  | 0.0168 | 1.5394 |
| TG(46:0)                          | 1.7424 | 0.0252 | 1.5257 |
| TG(57:2)                          | 1.8018 | 0.0247 | 1.5114 |
| TG(49:3)                          | 2.3189 | 0.0229 | 1.5081 |
| PE (36:3)                         | 0.4972 | 0.0216 | 1.508  |
| FA (15:0) (pentadecylic acid)     | 0.5665 | 0.0239 | 1.5013 |
| TG(56:1)                          | 1.7879 | 0.0215 | 1.4993 |
| FA (28:0) (montanic acid)         | 0.4401 | 0.0152 | 1.466  |
| PC(36:4) B                        | 0.6527 | 0.0118 | 1.4631 |
| TG(54:7) A                        | 3.2298 | 0.0062 | 1.4614 |
| TG(60:1)                          | 1.7024 | 0.0354 | 1.459  |
| CE(16:1)                          | 0.4568 | 0.0143 | 1.4573 |
| TG(51:4)                          | 2.9867 | 0.0099 | 1.4533 |
| TG(62:3)                          | 2.2629 | 0.0251 | 1.4401 |
| TG(56:5) C                        | 2.1027 | 0.0135 | 1.4372 |
| LPC (20:0)                        | 1.5805 | 0.0422 | 1.4356 |
| TG(54:6) A                        | 2.8895 | 0.009  | 1.4279 |
| PE (p-36:5) or PE (o-36:6)        | 0.4114 | 0.0094 | 1.4112 |
| TG(58:1)                          | 1.7301 | 0.0299 | 1.409  |
| TG(46:3) A                        | 2.4822 | 0.0176 | 1.3936 |
| TG(60:3)                          | 2.1477 | 0.0277 | 1.3908 |
| TG(62:4)                          | 2.3849 | 0.0252 | 1.378  |
| PC(33:1)                          | 0.6247 | 0.0143 | 1.3747 |
| FA (17:0) (margaric acid)         | 0.5839 | 0.0155 | 1.3741 |
| TG(46:2)                          | 2.0299 | 0.0315 | 1.3688 |
| TG(56:9)                          | 2.1311 | 0.0104 | 1.3613 |
| TG(58:6)                          | 2.5194 | 0.0143 | 1.3479 |
| TG(64:3)                          | 1.8311 | 0.0466 | 1.3411 |
| SM (d34:1)                        | 0.5203 | 0.0293 | 1.3385 |
| DG(32:0)                          | 1.7208 | 0.0229 | 1.336  |
| TG(53:4)                          | 2.5001 | 0.0143 | 1.3174 |
| TG(51:5)                          | 2.0261 | 0.0352 | 1.3111 |
| TG(49:2)                          | 2.6427 | 0.0315 | 1.3084 |
| TG(50:5)                          | 2.2246 | 0.0184 | 1.308  |
| TG(52:5)                          | 2.8341 | 0.0135 | 1.3015 |
| TG(48:4) B                        | 1.6353 | 0.0315 | 1.2996 |
| FA (20:5) (eicosapentaenoic acid) | 2.306  | 0.0045 | 1.2975 |
| TG(56:6)                          | 2.0436 | 0.0155 | 1.2874 |
| TG(58:2)                          | 1.9212 | 0.0315 | 1.2868 |

|                                  |        |        |        |
|----------------------------------|--------|--------|--------|
| TG(48:4) A                       | 1.8733 | 0.0229 | 1.2803 |
| TG(58:3)                         | 1.9127 | 0.0374 | 1.2782 |
| TG(60:6)                         | 2.1764 | 0.0152 | 1.2563 |
| TG (53:5)                        | 2.5106 | 0.0143 | 1.2529 |
| PC(36:1)                         | 0.6425 | 0.0263 | 1.2504 |
| SM (d34:2)                       | 0.4784 | 0.0393 | 1.2317 |
| TG(58:4)                         | 2.0458 | 0.0315 | 1.2017 |
| FA (18:3) (linolenic acid)       | 1.8606 | 0.0176 | 1.2006 |
| Cer(d42:2) B                     | 0.4905 | 0.0354 | 1.1863 |
| FA (18:2) (linoleic acid)        | 1.6259 | 0.0163 | 1.1825 |
| TG(54:5) A                       | 1.9687 | 0.0283 | 1.1767 |
| TG(53:3)                         | 2.0163 | 0.0347 | 1.1645 |
| TG(60:2)                         | 1.8369 | 0.0474 | 1.1587 |
| TAG 52:6; TAG 16:1-18:2-18:3;    | 2.422  | 0.0176 | 1.142  |
| TG(50:4)                         | 2.1943 | 0.0374 | 1.1114 |
| FA (22:6) (docosahexaenoic acid) | 2.0256 | 0.019  | 1.0628 |

**Table S4.** The total number (N) of lipids in each class, the number and percentage of significantly different lipids between Dys and Dia samples. \*FDR <0.05; fc > 1.5 | fc < (1/1.5) and vip > 1

| Class | N   | Significant lipids* | % within class | GAGE p-value |
|-------|-----|---------------------|----------------|--------------|
| TG    | 93  | 54                  | 58.1           | 4.2E-07      |
| FA    | 29  | 8                   | 27.6           | 0.4624       |
| PC    | 127 | 6                   | 4.7            | 0.9791       |
| LPC   | 23  | 5                   | 21.7           | 0.3552       |
| DG    | 12  | 4                   | 33.3           | 0.1887       |
| SM    | 30  | 3                   | 10.0           | 0.9944       |
| PE    | 27  | 3                   | 11.1           | 0.5856       |
| Cer   | 25  | 1                   | 4.0            | 0.9441       |
| CE    | 10  | 1                   | 10.0           | 0.8361       |

**Table S5.** Bile acids significantly reduced in Dys/Dia animals. Univariate weighted T-test result

| Annotation | FC     | FDR        | VIMP (normalized) |
|------------|--------|------------|-------------------|
| GCDCA      | 0.2575 | 4.021E-07  | 1                 |
| GCA        | 0.2830 | 0.0043     | 0.75              |
| TCDCA      | 0.3117 | 1.8927E-05 | 0.32              |
| TCA        | 0.3670 | 0.0006     | 0.18              |
| TLCA       | 0.4535 | 0.0143     | 0.13              |
| TUDCA      | 0.3836 | 0.0007     | 0.11              |

**Table S6.** Feces bile acids significantly changed in Dys/Dia animals. Univariate descriptive statistics (i.e. AUROC and the associated 95% confidence intervals for predicting T2D status)

| Feces bile acids | AUROC and 95% CI  | Dys/Dia vs. Healthy |
|------------------|-------------------|---------------------|
| TCA              | 0.30 [0.16, 0.44] | Down                |
| TUDCA            | 0.28 [0.15, 0.42] | Down                |
| TCDCa            | 0.23 [0.11, 0.35] | Down                |
| GCA              | 0.19 [0.07, 0.30] | Down                |
| GCDCA            | 0.17 [0.06, 0.27] | Down                |
